# Supplementary material
Source: PubMed Central journal article supplement (PMC3940483)
Supplement: NIHMS4003-supplement-supple_1.pdf [file NIHMS4003-supplement-supple_1.pdf]

**Supplementary Table 1. List of antibodies used for immunofluorescence and western-blot analyses.**

| <b>Primary Antibody</b>                 | <b>Dilution</b>     | <b>Source</b>                             |
|-----------------------------------------|---------------------|-------------------------------------------|
| Mouse anti-insulin                      | 1:1500              | Sigma, Saint Louis, Missouri, USA         |
| Guinea pig anti-insulin                 | 1:50                | Zymed, San Francisco, CA, USA             |
| Mouse anti-glucagon                     | 1:2000              | Sigma, Saint Louis, Missouri, USA         |
| Rabbit anti-Ki67                        | 1:200               | Abcam Inc. Cambridge, MA, USA             |
| Rabbit anti-PDX-1                       | 1:5000 <sup>a</sup> | Dr. Wright, University of Vanderbilt, USA |
| Guinea pig anti-PDX-1                   | 1:2000              | Dr. Wright, University of Vanderbilt, USA |
| Mouse anti-phospho Akt (Ser473)         | 1:2000 <sup>a</sup> | Cell Signaling Boston, MA, USA            |
| Rabbit anti-Akt                         | 1:3000 <sup>a</sup> | Cell Signaling Boston, MA, USA            |
| Rabbit anti-phospho GSK3 $\beta$ (Ser9) | 1:2000 <sup>a</sup> | Cell Signaling Boston, MA, USA            |
| Rabbit anti-phospho GSK3 $\beta$ (Y216) | 1:2000 <sup>a</sup> | Abcam Inc. Cambridge, MA, USA             |
| Rabbit anti-GSK3 $\beta$                | 1:2000 <sup>a</sup> | Cell Signaling Boston, MA, USA            |
| Mouse anti-Cyclin D1                    | 1:2000 <sup>a</sup> | Cell Signaling Boston, MA, USA            |
| Mouse anti-Calnexin                     | 1:2000 <sup>a</sup> | BD Biosciences Mississauga, ON Canada     |
| Mouse anti- $\beta$ -actin              | 1:5000 <sup>a</sup> | Sigma-Aldrich; Oakville, ON, CA           |

<sup>a</sup>dilution factor applied for western blot analysis.

**Supplementary Table 2. Sequences of primers used in real-time PCR**

| <b>Primer Name</b>         | <b>Accession &amp; Definition</b> | <b>Primer Pair Sequence 5'-3'(Sense/Antisense)</b>         | <b>Location (nt)</b>   | <b>Fragment Size(bp)</b> |
|----------------------------|-----------------------------------|------------------------------------------------------------|------------------------|--------------------------|
| <b>CyclinD1</b><br>(Ccnd1) | NM_007631.2                       | CTG TGC GCC CTC CGT ATC TTA<br>TCG GGC CGG ATA GAG TTG TCA | 343-363<br>636-616     | 294                      |
| <b>Insulin I</b>           | NM_008386.3                       | TGT TGG TGC ACT TCC TAC CC<br>ATC CAC AAT GCC ACG CTT CT   | 191-210<br>456-437     | 266                      |
| <b>Insulin II</b>          | NM_008387.3                       | GCA GCA CCT TTG TGG TTC CC<br>GCA GCA CTG ATC TAC AAT GCC  | 154-173<br>361-341     | 208                      |
| <b>Mafa</b>                | NM_194350.1                       | AGC GCT TCT CCG ACG ACC AG<br>GGC CCG CCA ACT TCT CGT AT   | 692-711<br>976-957     | 285                      |
| <b>Pdx1</b>                | NM_008814.2                       | CCA CCC CAG TTT ACA AGC TCG<br>GTA GGC AGT ACG GGT CCT CT  | 252-272<br>575-556     | 324                      |
| <b>18S</b>                 | NR_003278.1                       | GTA ACC CGT TGA ACC CCA TTC<br>CCA TCC AAT CGG TAG TAG CG  | 1577-1597<br>1727-1708 | 151                      |

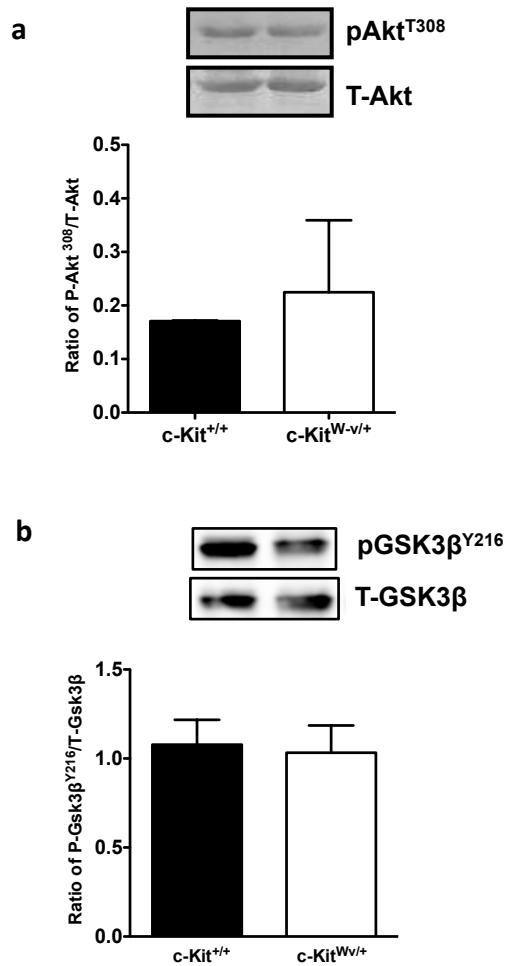

**Supplemental Fig. S1:** Western blot analysis of phosphorylated (P) Akt T308 and Gsk3β Y216, total (T) Akt and Gsk3β protein level in the isolated islets of *c-Kit*<sup>+/+</sup> and *c-Kit*<sup>Wv/+</sup> male mice at 8 week of age. Representative blots are shown. Data are normalized to either total Akt or Gsk3β protein and expressed as means ± SEM (*n*=3 per experimental group)

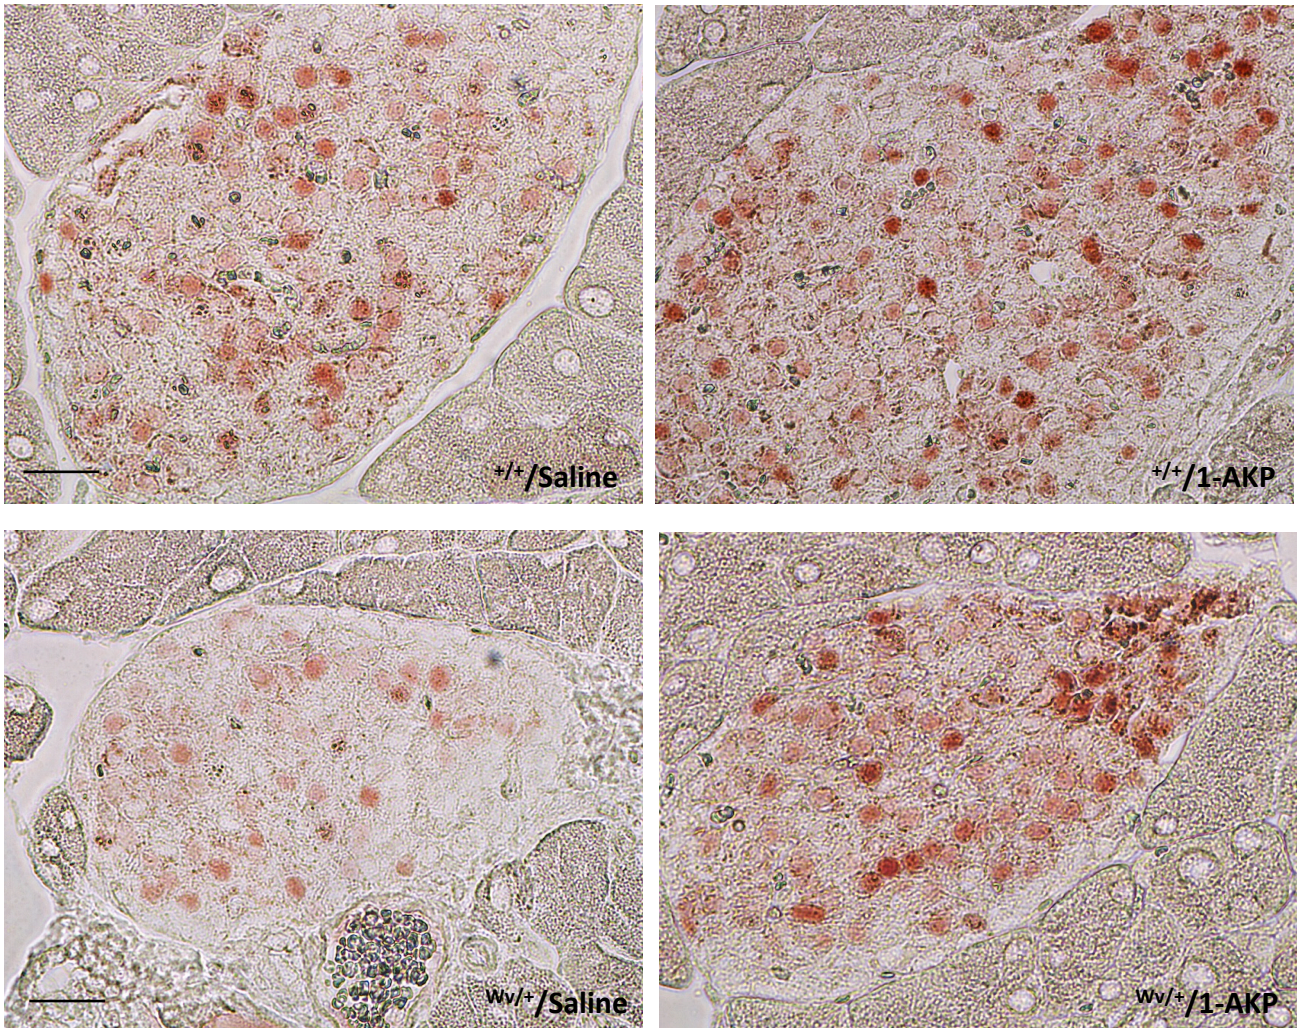

**Supplemental Fig. S2:** Immunohistochemical staining for Mafa (red) of *c-Kit*<sup>+/+</sup>/*saline*, *c-Kit*<sup>+/+</sup>/*1-AKP*, *c-Kit*<sup>Wv/+</sup>/*saline*, and *c-Kit*<sup>Wv/+</sup>/*1-AKP* mice pancreatic section. An increased Mafa staining intensity was observed in the islet of *c-Kit*<sup>Wv/+</sup>/*1-AKP* mice when compared to *c-Kit*<sup>Wv/+</sup>/*saline* treated mice. No counterstaining was applied and nuclei are white transparent. Original magnificant 400x

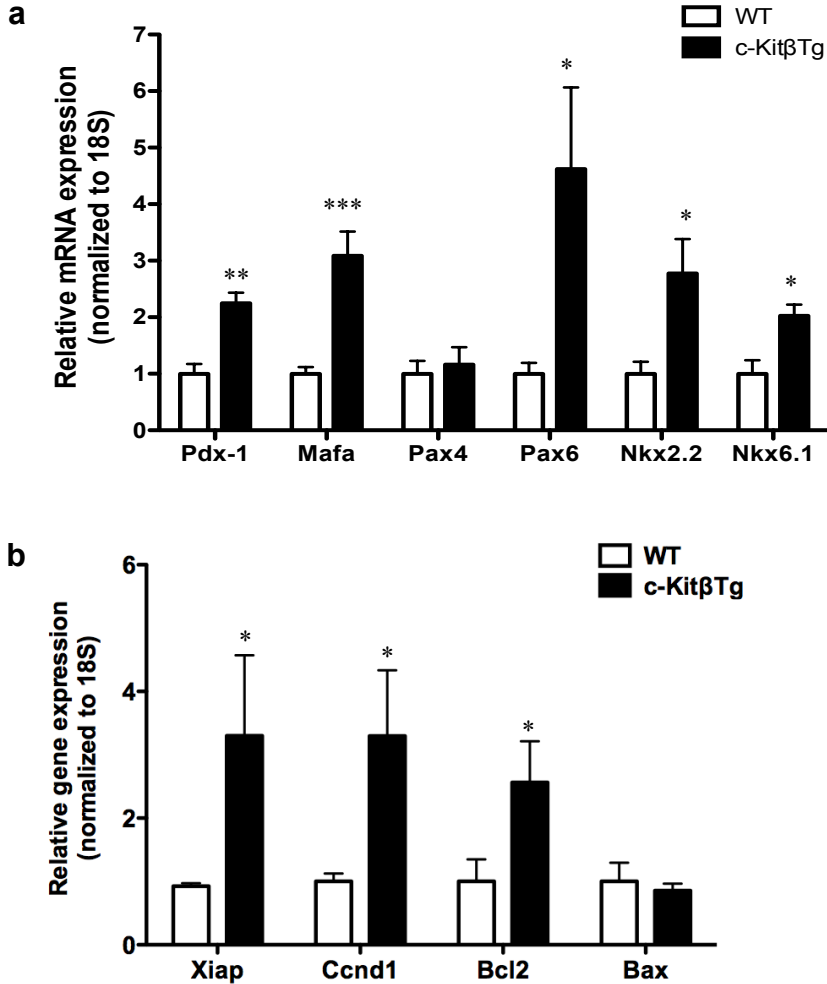

**Fig. 1 for review only:** Transcription factors and signaling molecules expression in *c-Kit $\beta$ Tg* mice. Quantitative RT-PCR analysis of islet transcription factors (a) and signaling molecules downstream of Akt/Gsk3 $\beta$  (b) in isolated islets of WT and *c-Kit $\beta$ Tg* mice at 8 weeks of age. Data are expressed as means  $\pm$  SEM ( $n=4-8$ ). \* $p<0.05$ , \*\* $p<0.01$ , \*\*\* $p<0.001$  vs. WT mice.

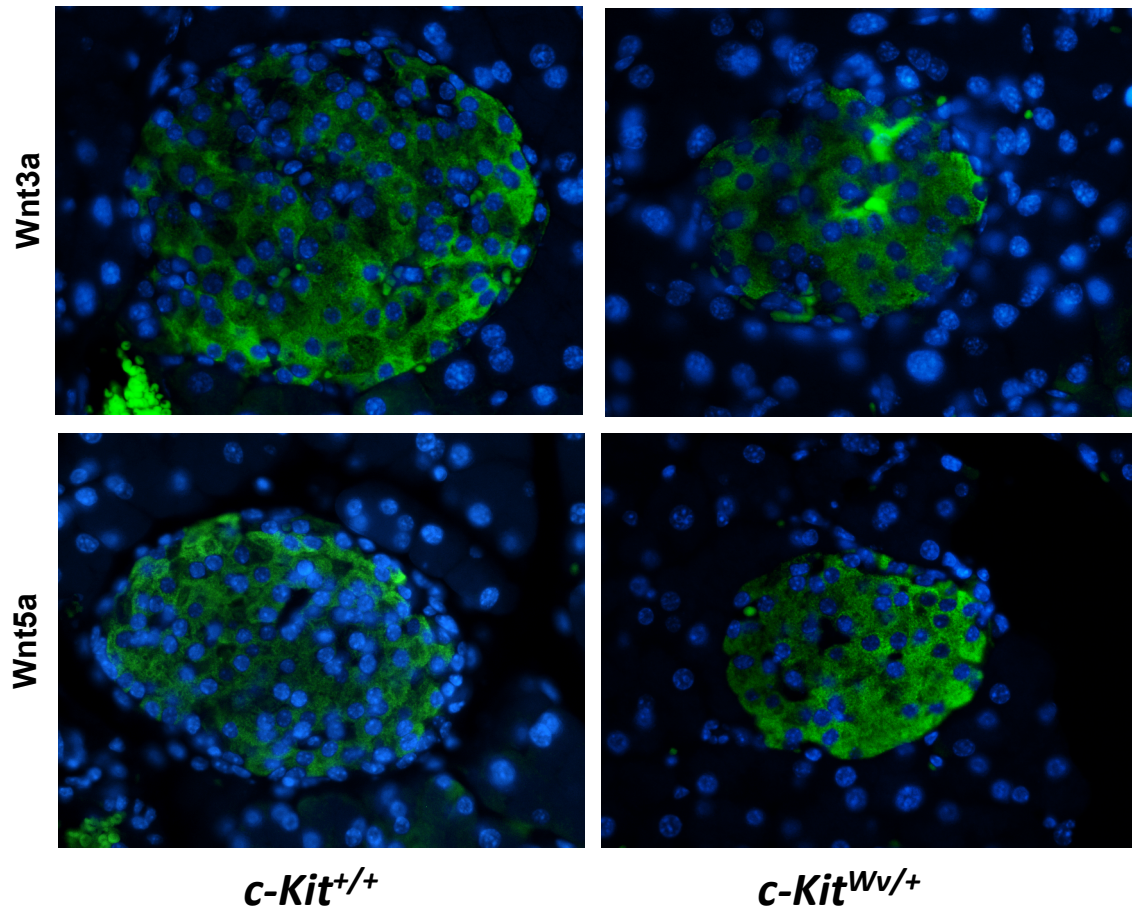

**Fig. 2 for review only:** Immunofluorescence staining for Wnt3a and Wnt5a (green) of *c-Kit*<sup>+/+</sup> and *c-Kit*<sup>Wv/+</sup> mice pancreatic section. A similar staining intensity was observed in the islet of *c-Kit*<sup>+/+</sup> and *c-Kit*<sup>Wv/+</sup> mice. Original magnification 400x

For review only

71st Scientific Sessions

Document ID: 2751ADA11D1

## Improved $\beta$ -cell proliferation and function in $c\text{-Kit}^{Wv/+};\text{Fas}^{lpr/lpr}$ double mutant mice

Zhi Chao Feng<sup>1,2</sup>, Matthew Riopel<sup>1,3</sup>, Jinming Li<sup>1,2</sup>, Lisa Donnelly<sup>1</sup>, Rennian Wang<sup>1,2,4</sup>

Children's Health Research Institute<sup>1</sup>, Departments of Physiology/Pharmacology<sup>2</sup>, Department of Pathology<sup>3</sup>, Medicine<sup>4</sup>, The University of Western Ontario, London, ON, Canada

Understanding the molecular mechanisms that control the balance between proliferation and death of pancreatic  $\beta$ -cells has important implications for diabetes. c-Kit receptor and its ligand, stem cell factor, are important for  $\beta$ -cell survival and maturation while Fas (CD95) is a member of the tumor necrosis factor receptor family capable of triggering  $\beta$ -cell apoptosis. Our previous *in vivo* studies of c-Kit deficient ( $c\text{-Kit}^{Wv/+}$ ) male mice have determined that disruption of c-Kit receptor signaling leads to a severe loss of  $\beta$ -cell mass and function with a significant increase in Fas expression and cell apoptosis. This led us to hypothesize that activation of the c-Kit receptor signaling regulates  $\beta$ -cell survival by down-regulating the Fas-mediated cell death cascade. Using a double ( $c\text{-Kit}^{Wv/+};\text{Fas}^{lpr/lpr}$ ) mutant mouse model, we found that  $c\text{-Kit}^{Wv/+};\text{Fas}^{lpr/lpr}$  male mice displayed a significant improvement in fasting blood glucose levels ( $p < 0.01$ ) and glucose tolerance ( $p < 0.05$ ) when compared with  $c\text{-Kit}^{Wv/+};\text{Fas}^{+/+}$  mice. Glucose-stimulated insulin secretion tests *in vivo* revealed that  $c\text{-Kit}^{Wv/+};\text{Fas}^{lpr/lpr}$  mice also displayed improved  $\beta$ -cell function and increased  $\beta$ -cell proliferation ( $p < 0.001$ ) that was associated with increased islet number and  $\beta$ -cell mass. These  $c\text{-Kit}^{Wv/+};\text{Fas}^{lpr/lpr}$  mice also showed a significant increase in insulin and Pdx-1 mRNA expression when compared to  $c\text{-Kit}^{Wv/+};\text{Fas}^{+/+}$  mice. Taken together, these results demonstrate that down-regulation of the Fas pathway in c-Kit-deficient mice results in improved  $\beta$ -cell survival and function. This study shows that cross-talk between the c-Kit and Fas signaling pathways is critical for the regulation of  $\beta$ -cell mass and function.
